# Supplementary material
Source: bioRxiv or medRxiv preprint supplement (https://www.biorxiv.org/content/biorxiv/early/2020/05/01/2020.04.30.071100/DC1/embed/media-1.pdf)
Supplement: Supplementary file [file media-1.pdf]

**Title: Evidence for unique small RNA modifications in Alzheimer's disease**

**(Data Supplement)**

Xudong Zhang<sup>1\*</sup>, Fatima Trebak<sup>2\*</sup>, Lucas AC Souza<sup>2</sup>, Junchao Shi<sup>3</sup>, Tong Zhou<sup>3</sup>,

Patrick G. Kehoe<sup>4</sup>, Qi Chen<sup>1#</sup>, Yumei Feng Earley<sup>2#</sup>

1. Division of Biomedical Sciences, School of Medicine, University of California, Riverside, Riverside, CA, USA
2. Departments of Pharmacology, Physiology & Cell Biology, Center for Molecular & Cellular Signal Transduction in the Cardiovascular System, University of Nevada, Reno, School of Medicine, Reno, NV, USA
3. Departments of Physiology & Cell Biology, University of Nevada, Reno, School of Medicine, Reno, NV, USA
4. Dementia Research Group, Translational Health Sciences, Bristol Medical School, University of Bristol, Bristol, UK

\*Contributed equally to this work

**#Correspondence to:**

**Yumei Feng Earley, MD, PhD, FAHA**

Associate Professor of Pharmacology and Physiology & Cell Biology  
Center for Molecular & Cellular Signal Transduction in the Cardiovascular System  
University of Nevada, Reno, School of Medicine  
1664 North Virginia Street, Mail-stop 0318  
Reno, NV, 89557, USA  
E-mail: [yumeifeng@med.unr.edu](mailto:yumeifeng@med.unr.edu)

**Qi Chen, MD, PhD**

Assistant Professor  
Division of Biomedical Sciences, School of Medicine  
University of California, Riverside  
Riverside, CA, 92521, USA  
E-mail: [Qi.Chen@medsch.ucr.edu](mailto:Qi.Chen@medsch.ucr.edu)

# Figure S1.

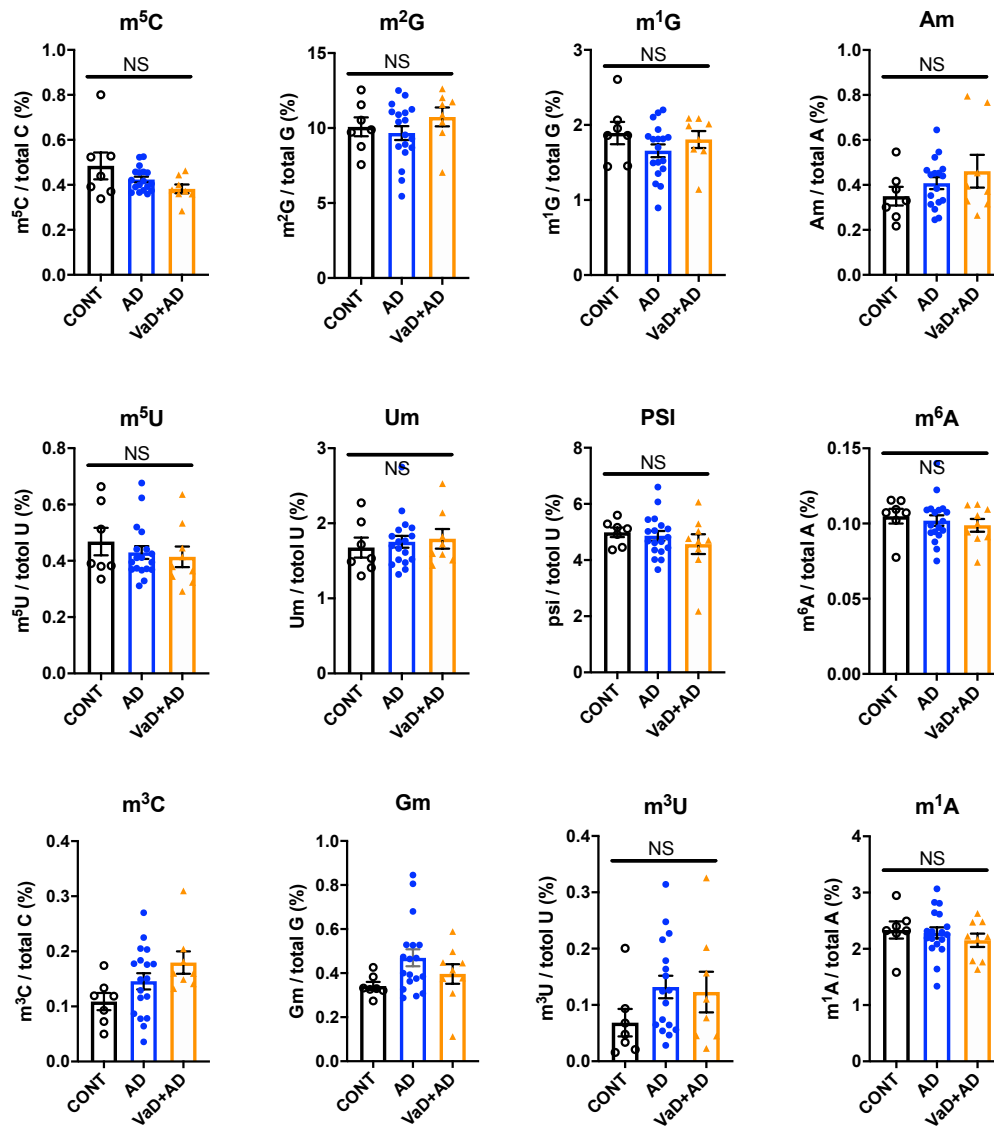

**Figure S1.** miRNA modifications in the prefrontal lobe cortex of AD and VaD+AD patients. There were no changes in 15–25-nt small RNA modifications in the cortex of AD and VaD+AD compared with CONT subjects ( $n = 7$  for CONT,  $n = 18$  for AD, and  $n = 9$  for VaD+AD; \*  $P < 0.05$  vs. CONT).

**Figure S2.**

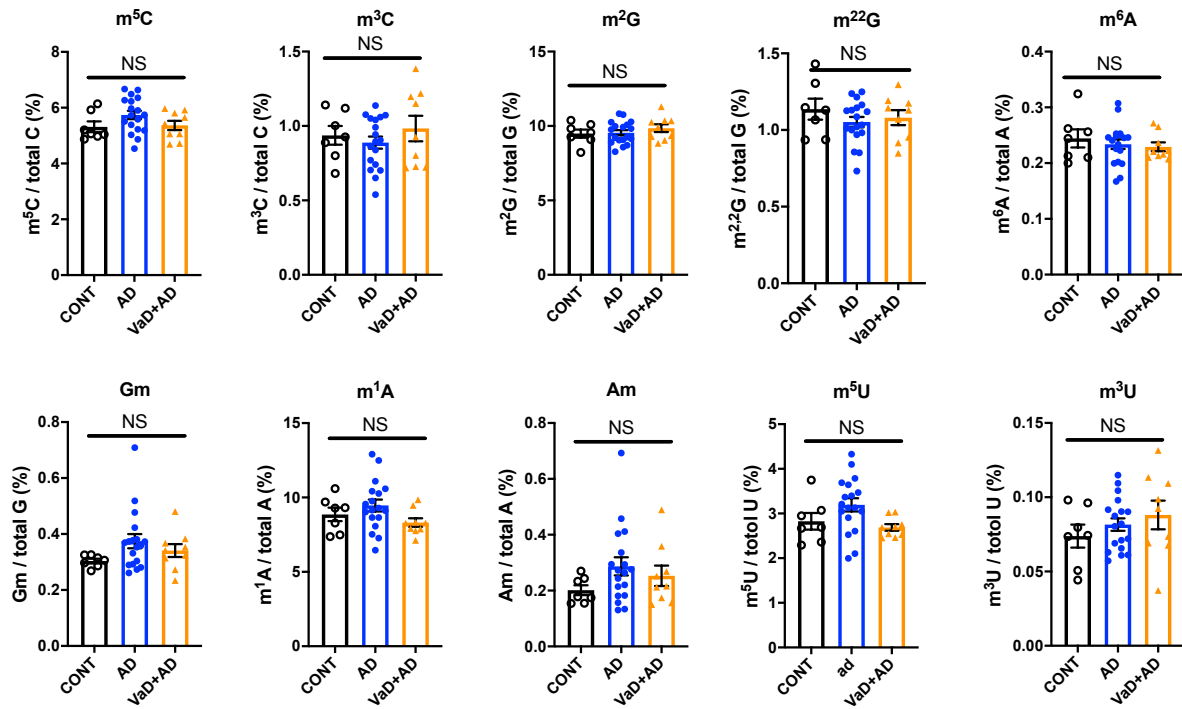

**Figure S2.** Small RNA (30–40 nt) modifications in the prefrontal lobe cortex of AD and VaD+AD patients. There were no changes in 30–40-nt small RNA modifications in the cortex of AD and VaD+AD compared with CONT subjects ( $n = 7$  for CONT,  $n = 18$  for AD, and  $n = 9$  for VaD+AD;  $* P < 0.05$  vs. CONT).
